# Supplementary material for: Ni2+-substituted Mg–Cu–Zn ferrites: a colloidal approach of tuning structural and electromagnetic properties
Source: Springer Nature journal article supplement (doi:10.1007/s10971-018-4665-3), 2018-05-11
Supplement: MOESM1 [file 15758326]

**Supplementary information**

**S1. Flow diagram of synthetic protocol**

**S2. SEM images of the samples.**

**S3. TEM images of the samples.**

**S4. Photograph of Susceptibility measurement set-up**

**-------------------------------------------------------------------------------------------------------------------------------------------**

**
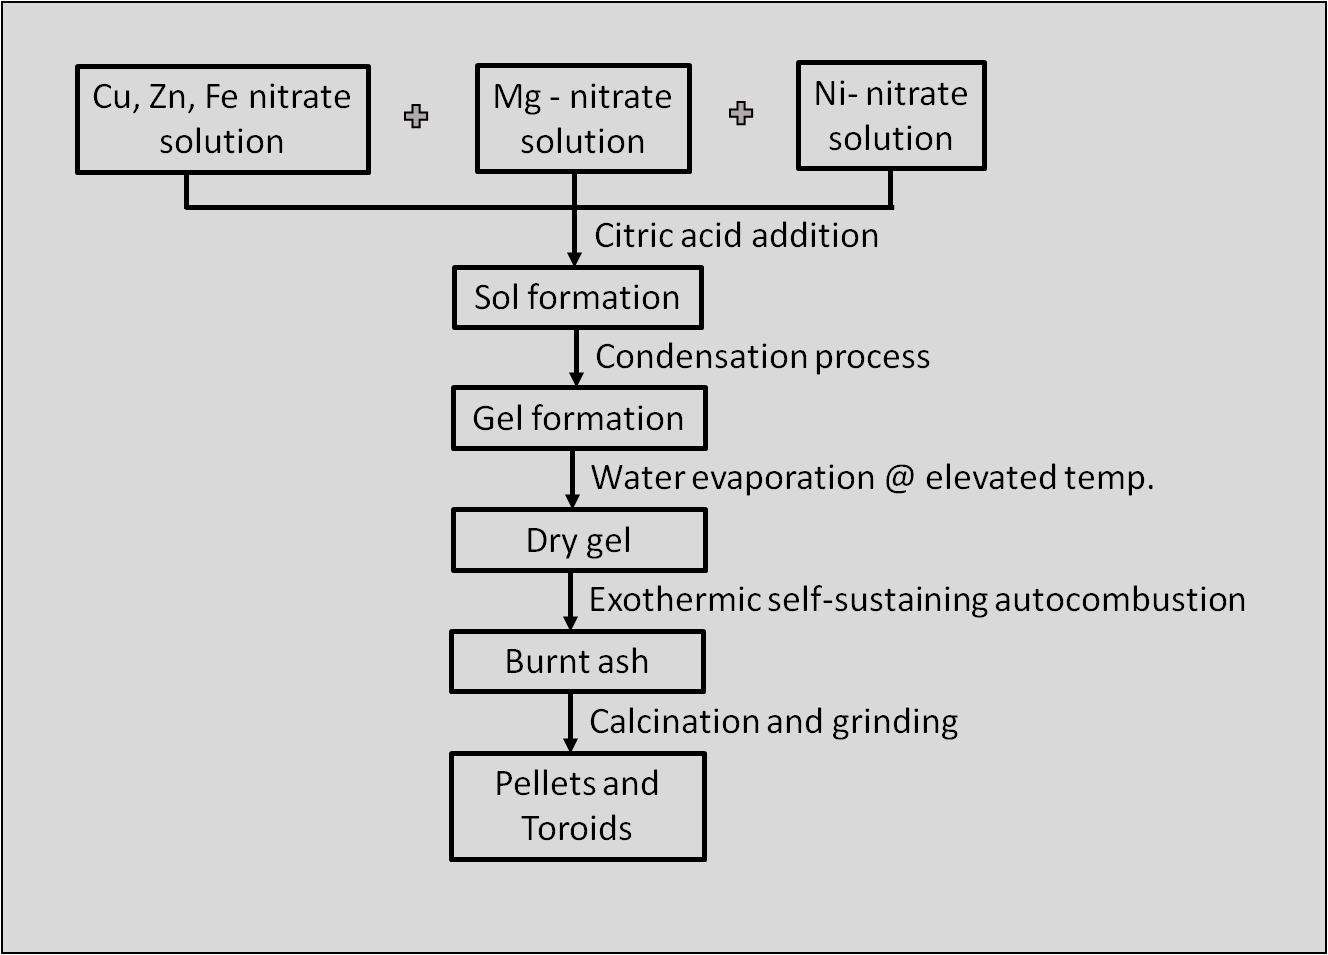
**

**Figure S1: Schematic flow of complete synthetic protocol**

**
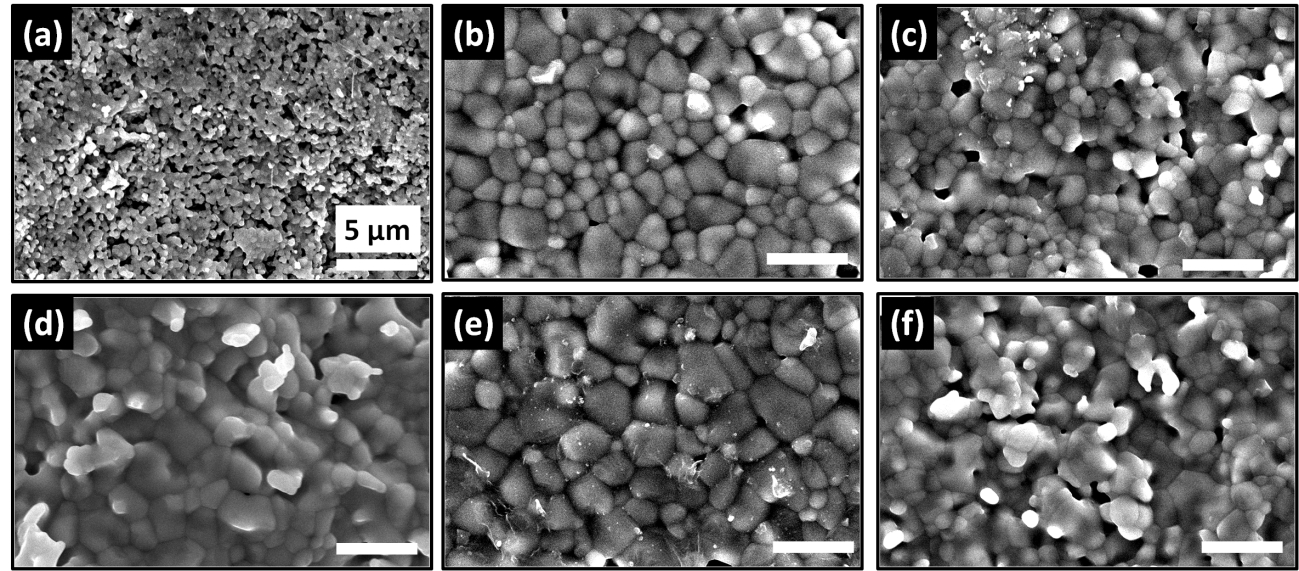
**

**Figure S2: SEM images of Mg0.25-xNixCu0.25Zn0.5Fe2O4 (0 ≤ x ≤ 0.25, a-e) for ferrites.**

**
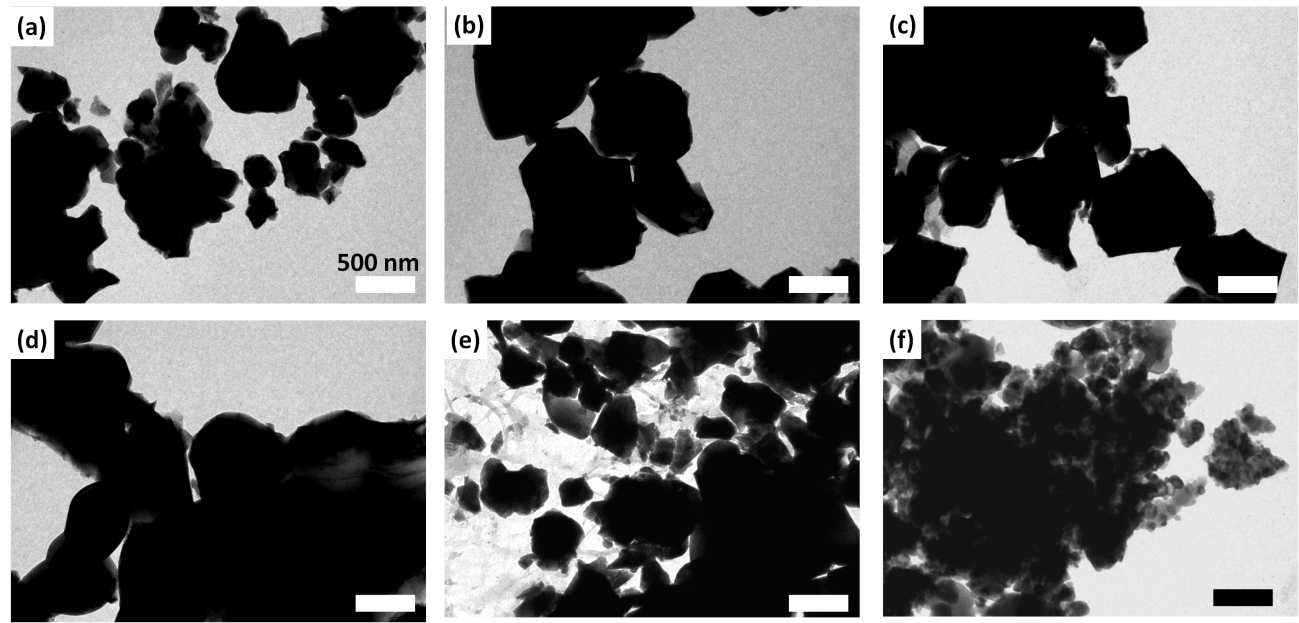
**

**Figure S3: TEM images of Mg0.25-xNixCu0.25Zn0.5Fe2O4 (0 ≤ x ≤ 0.25, a-e) for ferrites.**

**
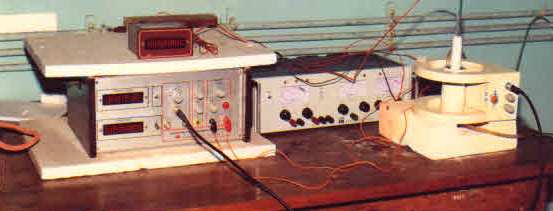
**

**Figure S4: Photograph of Susceptibility measurement set-up**
